# Supplementary material
Source: ML conference proceedings conference paper supplement (https://aclanthology.org/2020.sdp-1.18)
Supplement: OptionalSupplementaryMaterial [file 2020.sdp-1.18.OptionalSupplementaryMaterial.zip]

# Appendix

## Appendix A: Evaluation Metrics and resources used

### Mean Squared Error

[https://en.wikipedia.org/wiki/Mean\\_squared\\_error](https://en.wikipedia.org/wiki/Mean_squared_error)

Implementation SciKit Learn:

[https://scikit-learn.org/stable/modules/generated/sklearn.metrics.mean\\_squared\\_error.html](https://scikit-learn.org/stable/modules/generated/sklearn.metrics.mean_squared_error.html)

### Mean Absolute Error

[https://en.wikipedia.org/wiki/Mean\\_absolute\\_error](https://en.wikipedia.org/wiki/Mean_absolute_error)

[https://scikit-learn.org/stable/modules/generated/sklearn.metrics.mean\\_absolute\\_error.html](https://scikit-learn.org/stable/modules/generated/sklearn.metrics.mean_absolute_error.html)

### R2 score

[https://en.wikipedia.org/wiki/Coefficient\\_of\\_determination](https://en.wikipedia.org/wiki/Coefficient_of_determination)

[https://scikit-learn.org/stable/modules/generated/sklearn.metrics.r2\\_score.html](https://scikit-learn.org/stable/modules/generated/sklearn.metrics.r2_score.html)

### MCNemar's test

[https://en.wikipedia.org/wiki/McNemar%27s\\_test](https://en.wikipedia.org/wiki/McNemar%27s_test)

[https://www.statsmodels.org/dev/generated/statsmodels.stats.contingency\\_tables.mcnemar.html](https://www.statsmodels.org/dev/generated/statsmodels.stats.contingency_tables.mcnemar.html)

### Wilcoxon signed-rank test

[https://en.wikipedia.org/wiki/Wilcoxon\\_signed-rank\\_test](https://en.wikipedia.org/wiki/Wilcoxon_signed-rank_test)

<https://docs.scipy.org/doc/scipy/reference/generated/scipy.stats.wilcoxon.html>

## Appendix B: Validation Scores

This appendix reports the validation scores for the metric that was used for model selection. This is accuracy in case of the first task, accept/reject prediction on PeerRead and the  $R^2$  score in case of the second task, citation score prediction. The highest validation scores reported for these models correspond to the epoch and corresponding model checkpoint that is then selected to use as the model for generating the predictions for the test set with.

**Table B1: Task 1 - PeerRead validation accuracy different models, for the model checkpoints that are also used for the test set (selected because of highest validation score).**

| arXiv sub-domain dataset | Average Word Embeddings | BiLSTM (re-implemented) | HAN              | HAN <sub>ST</sub> |
|--------------------------|-------------------------|-------------------------|------------------|-------------------|
| artificial intelligence  | 68.3 $\pm$ 2.24%        | 90.1 $\pm$ 0.28%        | 89.9 $\pm$ 1.71% | 88.8 $\pm$ 1.29%  |
| computation & language   | 70.5 $\pm$ 0.00%        | 79.3 $\pm$ 0.44%        | 77.5 $\pm$ 0.87% | 77.8 $\pm$ 1.16%  |
| machine learning         | 69.0 $\pm$ 0.40%        | 77.1 $\pm$ 1.28%        | 75.3 $\pm$ 2.82% | 76.1 $\pm$ 1.39%  |

**Table B2: Task 2 - S2ORC dataset validation  $R^2$  scores different models, using the model checkpoints that are also used for the test set (selected because of highest validation score).**

| Average Word Embeddings | BiLSTM (re-implemented) | HAN                | HAN <sub>ST</sub>  |
|-------------------------|-------------------------|--------------------|--------------------|
| 0.211 $\pm$ 0.0008      | 0.229 $\pm$ 0.0064%     | 0.257 $\pm$ 0.0047 | 0.261 $\pm$ 0.0076 |

## Appendix C: Model Runtimes

This appendix reports both the time per example, the most normalized form of runtime measurement, as well as the total time per epoch.

For the first task, PeerRead accept/reject prediction, we used the computation and language domain as representative for time measuring.

The minority class contains 576 examples, therefore the resampled number of examples per epoch is 1152 (2 times the size of the minority class).

The average time per example is higher on the PeerRead task across systems, because the examples contain markedly more text.

However, in the second task: citation prediction, the number of examples is much higher (78894), which explains that despite the lower time per example, the total time per epochs is much higher in this task.

**Table C1: Average time/example during training. Time in milliseconds.**

| Task                                       | AWE  | BiLSTM | HAN   | HAN <sub>ST</sub> |
|--------------------------------------------|------|--------|-------|-------------------|
| PeerRead (computation and language domain) | 20.5 | 55.3   | 75.9  | 75.8              |
| citation prediction                        | 4.3  | 7.5    | 11.04 | 10.7              |

**Table C2: Average time/epoch during training. Time in seconds.**

| Task                                       | AWE | BiLSTM | HAN | HAN <sub>ST</sub> |
|--------------------------------------------|-----|--------|-----|-------------------|
| PeerRead (computation and language domain) | 24  | 64     | 87  | 87                |
| citation prediction                        | 349 | 593    | 872 | 848               |

The main observation here is that the computational cost jumps from AWE to BiLSTM and again from BiLSTM to HAN<sub>ST</sub>. However, the increase in computation cost from BiLSTM to HAN<sub>ST</sub> is less than factor 1.5 for both tasks, so this is manageable.
